# Supplementary material for: The polygalacturonase gene BcMF2 from Brassica campestris is associated with intine development
Source: PubMed Central journal article supplement — J Exp Bot. 2008 Nov 27;60(1):301–13. doi: 10.1093/jxb/ern295 (PMC3071776; doi:10.1093/jxb/ern295), 2008-11-27
Supplement: ern295_1.pdf [file ern295_1.pdf]

# The polygalacturonase gene *BcMF2* from *Brassica campestris* is associated with intine development

Li HUANG, Jiashu CAO\*, Aihong ZHANG, Yiqun YE, Yuchao ZHANG, Tingting LIU

## Supplemental Material

**Supplementary Table 1** Polygalacturonase amino acid sequences used in the molecular phylogenetic analysis.

| Abbreviation                 | Species (gene name, expression)                        | SwissProt No. | GenBank No. |
|------------------------------|--------------------------------------------------------|---------------|-------------|
| BcMF2                        | <i>Brassica campestris</i>                             | —             | EU181170    |
| <b>Endopolygalacturonase</b> |                                                        |               |             |
| Actde.pg                     | <i>Actinidia deliciosa</i> (leaf & bud)                | P35336        | L12019      |
| Actde2.pg                    | <i>Actinidia deliciosa</i> (fruit)                     | —             | AAF71160    |
| Arath11.pg                   | <i>Arabidopsis thaliana</i> (root & seedling)          | Q38958        | X98130      |
| Arath12.pg                   | <i>Arabidopsis thaliana</i>                            | O22699        | AC002292    |
| Brana1.pg                    | <i>Brassica napus</i> (PG35-8) (pod dehiscence)        | Q42399        | X95800      |
| Brana2.pg                    | <i>Brassica napus</i> (SAC66) (pod development)        | Q42636        | Z49971      |
| Brana3.pg                    | <i>Brassica napus</i> (PGAZ) (leaf abscission)         | —             | AJ250919    |
| Cucme1.pg                    | <i>Cucumis melo</i> (fruit ripening)                   | O81244        | AF062465    |
| Cucme2.pg                    | <i>Cucumis melo</i> (MPG 2) (fruit ripening)           | O81245        | AF062466    |
| Cucme3.pg                    | <i>Cucumis melo</i> (fruit ripening)                   | O81246        | AF062467    |
| Cucsa.pg                     | <i>Cucumis sativus</i> (stress induced)                | —             | AB035890    |
| Glyma1.pg                    | <i>Glycine max</i> (roots, wound response)             | Q9SWS3        | AF128266    |
| LycesA.pg                    | <i>Lycopersicon esculentum</i> (PG2A, fruit)           | P05117        | X04583      |
| Lyces1.pg                    | <i>Lycopersicon esculentum</i> (TAPG1) (stigma, style) | O22311        | AF001000    |
| Lyces2.pg                    | <i>Lycopersicon esculentum</i> (TAPG2) (stigma, style) | Q96487        | AF001001    |
| Lyces3.pg                    | <i>Lycopersicon esculentum</i> (TAPG3) (abscission)    | O22310        | AF000999    |
| Lyces4.pg                    | <i>Lycopersicon esculentum</i> (TAPG4) (stigma, style) | Q96488        | U70481      |
| Lyces5.pg                    | <i>Lycopersicon esculentum</i> (TAPG5) (abscission)    | O22313        | AF001003    |
| Lyces6.pg                    | <i>Lycopersicon esculentum</i> (TAPG6)                 | O22610        | AF029230    |

|                                 |                                                 |        |          |
|---------------------------------|-------------------------------------------------|--------|----------|
| Lyces7.pg                       | <i>Lycopersicon esculentum</i> (stigma, style)  | —      | AF072732 |
| Lyces8.pg                       | <i>Lycopersicon esculentum</i> (wound response) | —      | AF118567 |
| Lyces9.pg                       | <i>Lycopersicon esculentum</i> (seed)           | —      | AF138858 |
| Maldo.pg                        | <i>Malus domestica</i> (fruit)                  | P48978 | L27743   |
| Orysa.pg                        | <i>Oryza sativa</i>                             | —      | AP003140 |
| Peram.pg                        | <i>Persea americana</i> (fruit)                 | Q02096 | X66426   |
| Pissa.pg                        | <i>Pisum sativum</i>                            | —      | AF361321 |
| Prupe1.pg                       | <i>Prunus persica</i> (PRF5)(fruit)             | P48979 | X76735   |
| Prupe3.pg                       | <i>Prunus persica</i>                           | Q43063 | X77231   |
| Rubid.pg                        | <i>Rubus idaeus</i> (fruit)                     | O65886 | AJ224147 |
| TsPG                            | <i>Turnera subulata</i> (short style)           | —      | AY185765 |
| Vitvi.pg                        | <i>Vitis vinifera</i> (fruit)                   | —      | AY043233 |
| <b>Exopolygalacturonase</b>     |                                                 |        |          |
| Arath1.epg                      | <i>Arabidopsis thaliana</i> (flower)            | P49063 | X72292   |
| Arath2.epg                      | <i>Arabidopsis thaliana</i> (PGA2) (flower)     | O65401 | X73222   |
| <b>Pollen Polygalacturonase</b> |                                                 |        |          |
| Goshi.pp                        | <i>Gossypium hirsutum</i> (G9) (pollen)         | Q39786 | U09717   |
| Medsa.pp                        | <i>Medicago sativa</i> (P73)(pollen)            | Q40312 | U20431   |
| Nicta.pp                        | <i>Nicotiana tabacum</i> (Npg1) (pollen)        | Q05967 | X71020   |
| Nicta2.pp                       | <i>Nicotiana tabacum</i> (sperm cell)           | —      | AF248538 |
| Salgi2.pp                       | <i>Salix gilgiana</i> (male flower)             | Q9MBB9 | AB029458 |
| TsPP                            | <i>Turnera subulata</i> (pollen)                | —      | AY185764 |
| Bran.pep                        | <i>Brassica napus</i> (Sta 44-4)(pollen)        | P35337 | L19879   |
| Oenor.pep                       | <i>Oenothera organensis</i> (pollen)            | P24548 | —        |
| Phlpr.pep                       | <i>Phleum pratense</i> (pollen)                 | Q9XG86 | AJ238848 |
| Zeama1.pep                      | <i>Zea mays</i> (pollen)                        | P26216 | X57627   |
| Braol.pp                        | <i>Brassica oleracea</i> (PG1) (pollen)         | —      | AF518563 |

|           |                                             |   |           |
|-----------|---------------------------------------------|---|-----------|
| Arath1.pp | <i>Arabidopsis thaliana</i> (PGA3) (pollen) | — | AY096534  |
| Arath2.pp | <i>Arabidopsis thaliana</i> (PGA4) (pollen) | — | NM_100158 |

---

Note: The terminations of abbreviations for the individual enzyme specificities following Markovič and Janeček (2001) are, pg (endopolygalacturonase), epg (exopolygalacturonase) pp (pollen polygalacturonase) pep (pollen exopolygalacturonase).
